# Supplementary material
Source: PubMed Central journal article supplement (PMC2793677)
Supplement: NIHMS91900-supplement-01.pdf [file NIHMS91900-supplement-01.pdf]

## Supplementary Materials for

### EGFR Signals to mTOR Through PKC and Independently of Akt in Glioma

Qi-Wen Fan, Christine Cheng, Zachary A. Knight, Daphne Haas-Kogan, David Stokoe, C. David James, Frank McCormick, Kevan M. Shokat, William A. Weiss\*

\*To whom correspondence should be addressed. E-mail: weiss@cgl.ucsf.edu

Published 27 January 2009, *Sci. Signal.* **2**, ra4 (2009)

DOI: 10.1126/scisignal.2000014

#### The PDF file includes:

Fig. S1. Inhibition or knockdown of EGFR, Akt, PI3K, and mTOR in glioma; effects of serum.

Fig. S2. PMA interferes with the ability of erlotinib to decrease phosphorylation of rpS6 in *PTEN*<sup>wt</sup> glioma cells regardless of *EGFR* status.

Fig. S3. Inhibition of PTEN leads to increased abundance of p-Akt in *PTEN*<sup>wt</sup> LN229: *EGFR* cells.

Fig. S4. Knockdown of PKC $\alpha$  and PKC $\delta$  in LN229:*EGFR* glioma cells.

Fig. S5. Abundance of EGFR, p-PKC $\alpha$ , p-PKC (pan), p-rpS6, and p-Akt in normal brain and primary human glioblastoma tumors.

Fig. S6. A PKC inhibitor blocks proliferation in both *PTEN*<sup>wt</sup> and *PTEN*<sup>mt</sup> glioma cell lines.

## Supplementary Materials for

### **EGFR signals to mTOR through PKC and independently of Akt in glioma**

Qi-Wen Fan, Christine Cheng, Zachary A. Knight, Daphne Haas-Kogan,  
David Stokoe, C. David James, Frank McCormick, Kevan M. Shokat,  
and William A. Weiss\*

\*To whom correspondence should be addressed. E-mail:weiss@cgl.usf.edu

#### **This PDF file includes:**

- Figure S1. Inhibition or knockdown of EGFR, Akt, PI3K and mTOR in glioma, effects of serum.
- Figure S2. PMA interferes with the ability of erlotinib to decrease phosphorylation of pS6 in *PTEN<sup>wt</sup>* glioma cells regardless of *EGFR* status.
- Figure S3. Inhibition of Pten leads to increased abundance of p-Akt in *PTEN<sup>wt</sup>* LN229:*EGFR* cells.
- Figure S4. Knock-down of PKC $\alpha$  and PKC $\delta$  in LN229:*EGFR* glioma cells.
- Figure S5. Abundance of EGFR, p-PKC $\alpha$ , p-PKC (pan), p-rpS6 and p-Akt in normal brain and primary human glioblastoma tumors.
- Figure S6. A PKC inhibitor blocks proliferation in both *PTEN<sup>wt</sup>* and *PTEN<sup>mt</sup>* glioma cell lines.

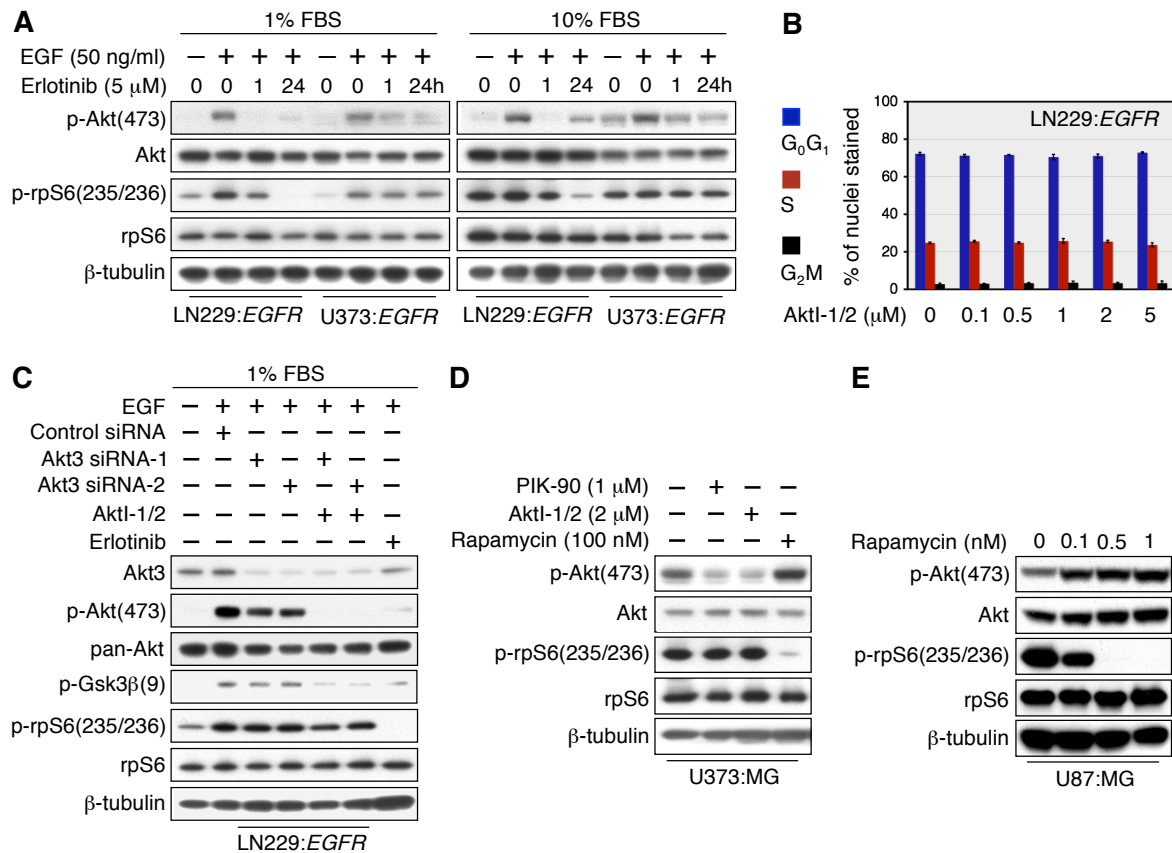

**Fig S1.** Inhibition or knockdown of EGFR, Akt, PI3K and mTOR in glioma; effects of serum. **(A)** Biochemical analysis of EGFR inhibition as a function of time and of serum concentration. Glioma cells in 1% or 10% FBS were treated with erlotinib (5  $\mu$ M) for 1 or 24h as shown. EGF (50 ng/ml) was added 15 min prior to harvest for immunoblot. Although erlotinib blocked Akt in both *PTEN*<sup>wt</sup> LN229:EGFR and in *PTEN*<sup>mt</sup> U373:EGFR cells irrespective of serum concentration, the ability of erlotinib to affect the abundance of p-rpS6 was limited to *PTEN*<sup>wt</sup> cells. **(B, C)** Small molecule inhibition **(B)** or siRNA knockdown of Akt isozyemes **(C)** failed to affect proliferation or the mTOR target p-rpS6 in *PTEN*<sup>wt</sup> LN229:EGFR cells. **(B)** LN229:EGFR cells (10% FBS) treated with Akt1-1/2 at doses ranging from 0.1-5  $\mu$ M showed no changes in cell cycle distribution. Percentage of cells in G<sub>0</sub>G<sub>1</sub>, S, and G<sub>2</sub>M phase of the cell cycle is indicated. Data shown are means  $\pm$  standard deviations for triplicate measurements. **(C)** Combined siRNA and small molecule inhibitor treatment in LN229:EGFR cells grown in 1% FBS for 48h led to undetectable p-Akt. Identical results were achieved using Akt3 siRNA-1 (Santa Cruz) and Akt3 siRNA-2 (Dharmacon). The abundance of p-rpS6 was either minimally affected or unaffected (note decreased levels of  $\beta$ -tubulin loading control in cells treated with both Akt3 siRNA-1 and Akt1-1/2), whereas phosphorylation of the Akt target p-Gsk3 $\beta$  was decreased. Dosages were 2  $\mu$ M (Akt1-1/2) and 5  $\mu$ M (erlotinib). **(D)** Small molecule inhibition of PI3K or Akt isozyemes 1 and 2 failed to affect phosphorylation of the mTOR target rpS6 in *PTEN*<sup>mt</sup> U373 MG cells. To extend results to *PTEN*<sup>mt</sup> glioma, we analyzed both Akt1-1/2 and the PI3K inhibitor PIK-90. Inhibition of PI3K, or Akt1 and Akt2 at doses effective against p-Akt again had no affect on p-rpS6. Rapamycin inhibited rpS6 phosphorylation, a result also observed in *PTEN*<sup>mt</sup> U87:MG **(E)**.

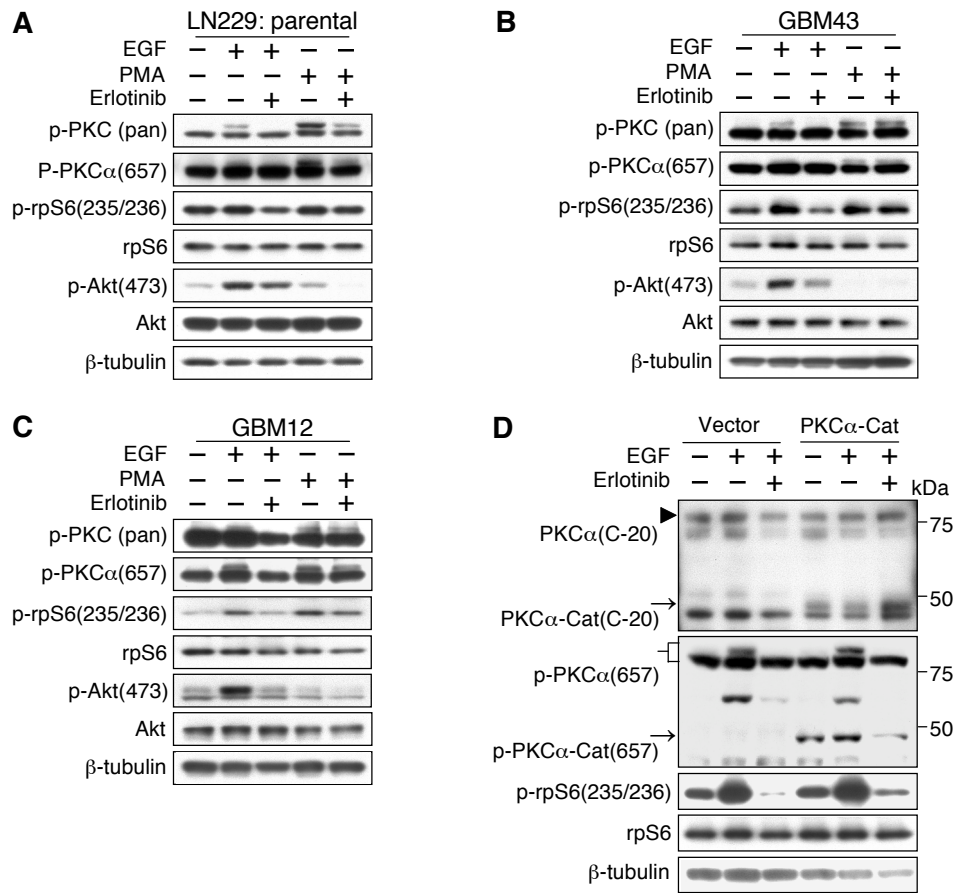

**Fig S2.** PMA interferes with the ability of erlotinib to decrease phosphorylation of p-rpS6 in *PTEN*<sup>mt</sup> glioma cells regardless of *EGFR* status. To assess signaling between *EGFR*, *PKC $\alpha$* , and mTOR in the absence or presence of *EGFR* amplification, we analyzed (A) LN229 parental cells, (B) GBM43, a primary glioma xenograft wild-type for both *PTEN* and *EGFR*, and (C) GBM12, a primary glioma xenograft wild-type for *PTEN* and amplified for *EGFR*. PMA (100 nM) elicited appearance of a slowly migrating p-PKC $\alpha$  band in all cell lines and primary xenografts. In EGF-treated cells, erlotinib (5  $\mu$ M) transformed this apparent doublet to a single more rapidly migrating band. Erlotinib treatment also blocked increased p-rpS6 abundance in response to EGF. In PMA-treated cells, this doublet was still evident in the setting of erlotinib treatment and correlated with reduced activity of erlotinib against p-rpS6. (D) A dominant-active allele of *PKC $\alpha$*  [*PKC $\alpha$ -Cat*] blocks the biochemical activity of erlotinib (5  $\mu$ M) against p-rpS6 in LN229:*EGFR* cells grown in 1% FBS. Immunoblot using antisera against C-terminus of *PKC $\alpha$*  shows levels of *PKC $\alpha$ -Cat* comparable to those observed for endogenous *PKC $\alpha$* . Erlotinib (5  $\mu$ M) blocked induction of p-rpS6 in control cells, but was less effective in cells transduced with *PKC $\alpha$ -Cat*. The effect seen is likely an underestimate, as *PKC $\alpha$ -Cat* cells treated with both EGF and erlotinib were underloaded on blot shown (note level of  $\beta$ -tubulin control).

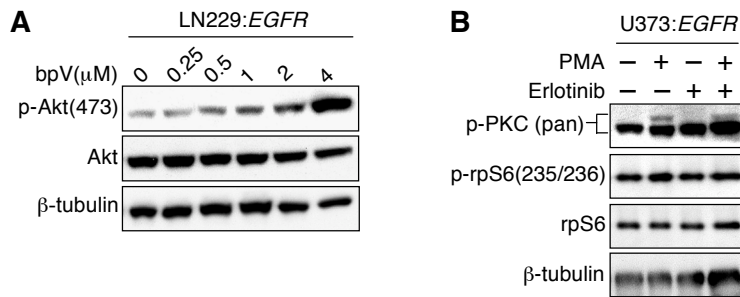

**Fig S3.** Inhibition of Pten leads to increased abundance of p-Akt in *PTEN*<sup>mt</sup> LN229:EGFR cells. **(A)** *PTEN*<sup>mt</sup> LN229:EGFR cells were treated with the Pten inhibitor bisperoxyvanadium for 24h at dosage indicated. Cells were lysed and immunoblotted as indicated. **(B)** *PTEN*<sup>mt</sup> U373:EGFR cells were treated with erlotinib (5  $\mu$ M) in the presence of PMA (100 nM) for 24h. Immunoblot shows appearance of a slowly migrating p-PKC protein in response to PMA, which was not affected by erlotinib.

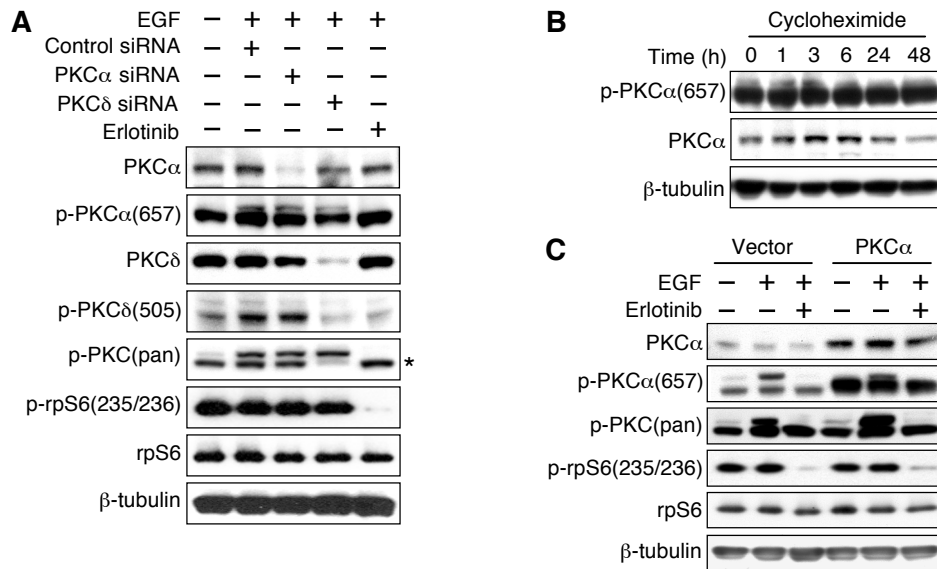

**Fig S4.** Knock-down of PKC $\alpha$  and PKC $\delta$  in LN229:*EGFR* glioma cells. **(A)** siRNAs directed against PKC $\alpha$  decreased the total abundance of PKC $\alpha$  without affecting the abundance of p-PKC $\alpha$ , suggesting that siRNA directed against PKC $\alpha$  could not be used to evaluate the role of p-PKC $\alpha$ . SiRNA against PKC $\delta$  blocked only the rapidly migrating phospho-PKC $\delta$  isoform, with no affect on the supershifted band, thereby excluding PKC $\delta$  as a critical intermediate between EGFR and mTOR. Erlotinib was added at 5  $\mu$ M. **(B)** Pulse chase analysis in the presence of cycloheximide (an inhibitor of protein synthesis) demonstrates that p-PKC $\alpha$  has  $t_{1/2}$ ~48h, explaining the high levels of p-PKC $\alpha$  observed after efficient knock-down of total PKC. Cycloheximide (25  $\mu$ M) was added for times shown. Cultures were treated with EGF for 15 min prior to harvest. **(C)** LN229:*EGFR* cells transduced with PKC $\alpha$  showed increased abundance of PKC $\alpha$  and p-PKC $\alpha$ , validating the specificity of antibody reagents against these proteins. EGF dose was (50 ng/ml).

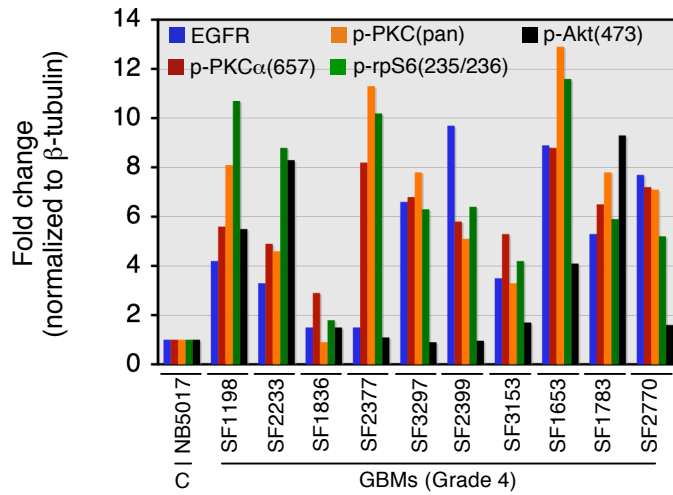

**Fig S5.** Abundance of EGFR, p-PKC $\alpha$ , p-PKC (pan), p-rpS6 and p-Akt in normal brain and primary human glioblastoma tumors (as compared to normal brain control and normalized to  $\beta$ -tubulin). Abundance of each protein in Fig 6 was quantitated using UMAX PowerLook Scanner and ImageJ software.

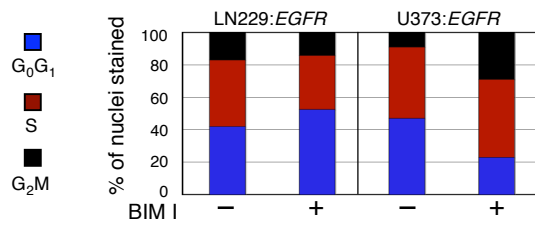

**Fig S6.** A PKC inhibitor blocks proliferation in both *PTEN*<sup>wt</sup> and *PTEN*<sup>mt</sup> glioma cell lines. *PTEN*<sup>wt</sup> and *PTEN*<sup>mt</sup> cell lines shown were treated with 5  $\mu$ M of the pan-PKC inhibitor bisindolylmaleimide I (BIM I) for 24h. Flow cytometric analysis indicates percentage of cells in G<sub>0</sub>G<sub>1</sub>, S, and G<sub>2</sub>M phases of the cell cycle. That BIM treatment led to arrest at G<sub>1</sub> in *PTEN*<sup>wt</sup> LN229:EGFR and at G<sub>2</sub> in *PTEN*<sup>mt</sup> U373:EGFR cells argues that the proliferative arrest induced by this agent results from on-target effects, rather than from non-selective toxicity.
